## Epigenetic Changes in the Hypothalamic Proopiomelanocortin and Glucocorticoid Receptor Genes in the Ovine Fetus after Periconceptional Undernutrition

Adam Stevens, Ghazala Begum, Alice Cook, Kristin Connor, Christopher Rumball, Mark Oliver, John Challis, Frank Bloomfield, and Anne White

Faculty of Life Sciences (G.B., A.W.) and Faculty of Medical and Human Sciences (A.S., A.C., A.W.), University of Manchester, Manchester M13 9PT, United Kingdom; Department of Physiology (K.C., J.C.), University of Toronto, Ontario, M5S 1A1 Canada; and Liggins Institute (K.C., C.R., M.O., F.B.), University of Auckland, Auckland 1142, New Zealand

Maternal food restriction is associated with the development of obesity in offspring. This study examined how maternal undernutrition in sheep affects the fetal hypothalamic glucocorticoid receptor (GR) and the appetite-regulating neuropeptides, proopiomelanocortin (POMC) and neuropeptide Y, which it regulates. In fetuses from ewes undernourished from –60 to +30 d around conception, there was increased histone H3K9 acetylation (1.63-fold) and marked hypomethylation (62% decrease) of the *POMC* gene promoter but no change in *POMC* expression. In the same group, acetylation of histone H3K9 associated with the hypothalamic *GR* gene was increased 1.60-fold and the *GR* promoter region was hypomethylated (53% decrease). In addition, there was a 4.7-fold increase in hypothalamic *GR* expression but no change in methylation of *GR* gene expression in the anterior pituitary or hippocampus. Interestingly, hypomethylation of both *POMC* and *GR* promoter markers in fetal hypothalami was also identified after maternal undernutrition from –60 to 0 d and –2 to +30 d. In comparison, the *Oct4* gene, was hypermethylated in both control and underfed groups. Periconceptional undernutrition is therefore associated with marked epigenetic changes in hypothalamic genes. Increase in *GR* expression in the undernourished group may contribute to fetal programming of a predisposition to obesity, via altered *GR* regulation of *POMC* and neuropeptide Y. These epigenetic changes in *GR* and *POMC* in the hypothalamus may also predispose the offspring to altered regulation of food intake, energy expenditure, and glucose homeostasis later in life. (*Endocrinology* 151: 3652–3664, 2010)

There is growing concern about the marked rise in incidence of patients with metabolic syndrome, which affects up to 25% of the population in the United States (1). At the core of the problem is the association between obesity and insulin resistance, which leads to increased risk of developing cardiovascular disease and diabetes (2).

There is considerable evidence to suggest that maternal undernutrition impacts on fetal development, leading to adult obesity (3–6). This is relevant not only for areas of the world where famine exists but also for developed coun-

tries where women of child-bearing age are encouraged to diet. It is thought that programming of the fetus generates changes that allow it adaption to decreased nutrition, which therefore are an advantage to a fetus born into an environment with limited access to food. This is described as the “thrifty phenotype” (7). However, subsequent increases in nutritional availability lead to increased risk of developing metabolic syndrome.

Mechanisms associated with the programming of metabolic syndrome are unclear, but alterations in the fetal hy-

ISSN Print 0013-7227 ISSN Online 1945-7170  
Printed in U.S.A.

Copyright © 2010 by The Endocrine Society

doi: 10.1210/en.2010-0094 Received January 25, 2010. Accepted May 20, 2010.

First Published Online June 23, 2010

Abbreviations: ARC, Arcuate nucleus; ChIP, chromatin immunoprecipitation; GR, glucocorticoid receptor; H3K9Ac, acetylation of histone H3; HPA, hypothalamic-pituitary-adrenal; HSD, honestly significant difference; NPY, neuropeptide Y; POMC, proopiomelanocortin; UCSC, University of California, Santa Cruz.

pothalamic-pituitary-adrenal (HPA) axis (8, 9) have been implicated (9, 10). Glucocorticoids have well-defined direct negative feedback on the hypothalamus and pituitary (11) and also act on the hippocampus, which expresses high levels of glucocorticoid receptors (GRs) in both adult and fetal tissues and is a target for fetal programming of glucocorticoid responses (12–14). Periconceptional undernutrition in sheep accelerates maturation of the fetal HPA axis in late gestation, associated with elevated fetal baseline cortisol concentrations (15). Approximately half of these ewes deliver early, suggesting a potential link between periconceptional maternal nutrition and preterm birth (16). Therefore, programming of the HPA axis may also impact on mechanisms that predispose to metabolic syndrome in adult offspring.

However, it is likely that effects of maternal undernutrition manifest at the level of the fetal hypothalamus given that energy homeostasis is tightly controlled in the hypothalamus to cope with fluctuations in energy consumption and expenditure. In particular, maternal undernutrition could affect the arcuate nucleus (ARC) anorexigenic neurons, which express proopiomelanocortin (POMC) and the orexigenic neurons, which express neuropeptide Y (NPY) (17). POMC plays a central role in energy homeostasis (18) as evidenced by POMC knockout mice that develop obesity (19) and enhanced responsiveness to high-fat feeding (20). POMC mutations have also been associated with obesity in humans (21, 22). In addition, hypothalamic POMC has been shown to regulate glucose homeostasis directly, and this function is impaired in obesity (23).

There is evidence, from rodent studies, that maternal perinatal undernutrition disturbs the hypothalamic POMC anorexigenic circuit in newborn pups (24) and in adult offspring, where it is associated with changes in the regulation of food intake, body weight, and energy metabolism (25). Also, rats exposed to prenatal undernutrition and postnatal high-fat diet exhibited increased food intake and fat mass, which correlated with an increase in hypothalamic POMC (26).

In sheep, fetal effects of midgestation nutrient restriction showed no change in fetal hypothalamic POMC expression at birth but a significant increase in expression at 1 yr of age when exposed to an obesogenic environment, thus suggesting that the expression of the *POMC* gene was programmed despite no initial change and that different windows of sensitivity may exist in different animal models (27). There is, also, evidence that periconceptional undernutrition in sheep results in glucose intolerance in postpubertal offspring (28).

It is not clear how maternal undernutrition would affect fetal hypothalamic feeding centers in a way that would

lead to inappropriate responses to high-fat diets in adult offspring. However, epigenetic programming of candidate genes in hypothalamic neurons seems a likely mechanism. Patterns of genomic DNA methylation are established during early embryonic development and then faithfully maintained through life by DNA methyltransferases (29–31). Acetylation of histones, including histone H3 (H3K9Ac) opens compact chromatin structures and allows transcription (32). The association of epigenetic changes with changes in mRNA expression is not necessarily acute; for instance, methylation of the GR exon 1 promoter region has been associated with long-term changes in gene expression due to changes in transcription factor binding (33). Therefore, a change in genomic DNA methylation can only result in a change in transcription when the transcription factor in question is present, whether this is acute or chronic depends on the transcription factor.

Changes in histone acetylation have been associated with the transcriptional regulation of POMC by glucocorticoids (34). Recently, a rat model of neonatal overfeeding has shown hypermethylation of the hypothalamic POMC promoter compared with constant hypomethylation of the *NPY* gene, implicating plasticity in the POMC promoter as a critical “set-point” for body weight regulation (35). However, nothing is currently known about comparable changes after undernutrition.

The GR has been implicated in programming with methylation of the GR exon 1 promoter region being associated with long-term changes in gene expression (30). Fetal exposure to maternal glucocorticoids also affects the HPA axis (36, 37). There are well-established causal relationships between the epigenetic state, GR expression, and the effects of maternal care on stress responses in rodent offspring (38). Undernutrition is known to decrease hypothalamic GR expression in adult rats (39, 40). Although glucocorticoids are key regulators of hypothalamic neuropeptides (41, 42), the potential role of epigenetic programming of the GR on regulation of energy homeostasis is unclear.

We and others have shown that hypothalamic neuropeptides are altered in obese Zucker rats (43–45), suggesting that neurons in this region may be an important target for epigenetic changes associated with maternal undernutrition. It has also been shown that sheep whose mothers were subjected to periconceptional undernutrition are heavier than controls at 10 months of age (28). Therefore, in this study, we examined whether epigenetic changes in POMC and GR were present in the hypothalami of late gestation fetuses from undernourished mothers using a sheep paradigm, chosen because of the similarity with the human fetal HPA axis and placental function

(46). We found that both *POMC* and *GR* genes are associated with changes in histone acetylation and promoter methylation. In addition, *GR* expression is already increased in fetal hypothalamic feeding centers. Perhaps more importantly, the hypomethylation of these *POMC* and *GR* promoter markers could influence *POMC* regulation and glucocorticoid effects on other hypothalamic energy regulating pathways. Early life epigenetic regulation of these neuropeptides by maternal nutritional status may therefore have implications for the glucose homeostasis, food intake, and energy balance of the adult offspring.

## Materials and Methods

### Animal management, nutritional manipulation, and surgery

Experiments were approved by the Animal Ethics Committee at the University of Auckland. Multiparous 4–5 yr old Romney ewes were acclimatized to a concentrate feed (CamTech, Cambridge, New Zealand) (47), then randomly divided into four groups: controls (*ad libitum* feeds at 3–4% of body weight per day); undernutrition from 60 d before until mating (–60 to 0), from 2 d before mating until 30 d after (–2 to +30), or from 60 d before until 30 d after mating (–60 to +30). Undernutrition comprised a 2-d fast, and then concentrates were individually adjusted to achieve and maintain 10–15% body weight reduction (47). Food intake was initially 1–2% of body weight per day, increasing to approximately 80% of controls (47). Ewes were fed *ad libitum* when not undernourished. After ultrasound scanning at 55 d, only singleton-bearing ewes were retained. Fetal and maternal catheterization was carried out at d 127 of gestation. The fetus was exposed through a midline incision in the maternal abdomen, and polyvinyl catheters were inserted into the tarsal artery and vein of both fetal hind limbs. Maternal femoral artery and vein catheters were also inserted. Fetal arterial blood samples (4 ml) were collected into chilled heparinized tubes twice daily at 0800 and 2000 h from d 131 to 135 of gestation for later plasma analysis. To collect fetal tissue, ewes were killed on gestational d 131 and 135 by a lethal iv dose of injectable pentobarbitone. Fetal hypothalami and pituitaries were dissected and immediately frozen until assay (47).

### Bioinformatic analysis of sheep genome

The human genome sequence (build GRCh37/hg19) and bovine genome sequence (build Baylor 4.0/bos Tau4) were used as a base to map the promoter regions of the *POMC*, *GR*, and *Oct4* genes 12 kb downstream of the ATG translational start site. CpG content was examined by sequence analysis and by GC content in a 5-bp widow [University of California, Santa Cruz (UCSC), please see <http://genome.ucsc.edu/>]. Areas of highly conserved mammalian sequence homology were identified from the UCSC website using multiple alignments of five vertebrate species (cow, dog, human, mouse, and platypus) with a measure of evolutionary conservation, based on a phylogenetic hidden Markov model, phastCons (48). Primers designed from the consensus sequence of these conserved homologous regions were used to amplify ovine genomic DNA. Successfully amplified ovine genomic DNA was sequenced and homology with the con-

served consensus sequence was analyzed using ClustalW 2.0 (European Molecular Biology Laboratory-European Bioinformatics Institute).

Primers used to generate the amplicons were as follows: *GR*, 5'-TTTGGAGGGACTGTGGTCC-3', 5'-AGCAGGAGGTG-GCAGGCC-3', size: 230 bp; for *POMC*, 5'-ACCCTCAGAGGT-GAGAAGCT-3', 5'-GGAAGGAGACCGGAGCCG-3', size: 160 bp; for *Oct4*, 5'-CCTGGATGAGCTTCCAAGG-3', 5'-CCTCG-GAGTTGCTCTCCAC-3', size: 223 bp.

### Hormone and peptide assays

The presence of *POMC* in fetal plasma samples was measured by ELISA, based on the immunoradiometric assay described previously (49) and shown to work in sheep (50). The assay does not cross-react with the bioactive peptide derivatives of *POMC*, ACTH (<3.6%) or  $\alpha$ -MSH (<2.2%), but does recognize both *POMC* and pro-ACTH (100%) (51). The limit of sensitivity of the *POMC* ELISA was 10 pmol/liter.

Plasma ACTH was measured using a commercial RIA (Diasorin, Stillwater, MN) previously validated for use in the sheep (52). Intra- and interassay coefficients of variation for the ACTH RIA were 11.8 and 5.6%.

Cortisol was measured using mass spectrometry as previously described (53).

### Quantitative analysis of mRNA expression

RNA from tissue was extracted with RNeasy kit (QIAGEN, Valencia, CA). Quantitative expression analysis of mRNA was undertaken using the Quantigene II system (Panomics, Inc., Fremont, CA) (54). Quanti-Gene assays were performed according to the manufacturer's protocol. Briefly, 2  $\mu$ g of total RNA in 10  $\mu$ l of ribonuclease-free water was loaded into each well of a 96-well plate and incubated with sheep target probes [probes synthesized by Panomics, Inc. from the following accession numbers: *POMC*, NM001009266; *NPY*, NM001009452; *GR*, NM001114186; or glyceraldehyde-3-phosphate dehydrogenase, AF030943], in conjunction with dendrimer DNA amplifier and labeled probes at 56 C overnight. After washes, chemiluminescent substrate was added to the wells and incubated at 56 C for 30 min, then read on a Mithras luminometer (Berthold, Pforzheim, Germany).

### Methylation-specific PCR analysis

Tissue specific methylated genomic DNA was enriched from total genomic DNA using the MethylCollector kit (ActiveMotif, Carlsbad, CA). Briefly, CpG methylated DNA was digested with MseI restriction endonuclease (New England Biolabs, Hitchin, UK), bound specifically to His-tagged recombinant methyl-CpG-binding domain protein 2b protein, captured with nickel-coated magnetic beads, and subsequent wash steps were performed with a stringent high-salt buffer to remove fragments with little or no methylation. The methylated DNA was then eluted from the beads. PCR was performed on input MseI digested DNA and compared with methylation-enriched DNA to establish relative differences in methylation state. PCR was performed in a final volume of 50  $\mu$ l, containing 10 pmol of each primer, 200  $\mu$ mol/liter of each dNTP, 2.5 U of *Taq* polymerase (QIAGEN), and 3  $\mu$ l of DNA template. The initial denaturation (97 C, 5 min) was followed by 30 cycles of 1 min at 95 C, 1 min at 58 C, 1 min at 72 C, and a final extension step at 72 C for 10 min. PCR band intensity for *POMC*, *GR*, and *Oct4* amplicons

was quantified using ImageJ software (developed by Wayne Rasband; National Institutes of Health, Bethesda, MD).

### Chromatin immunoprecipitation (ChIP)

ChIP studies were performed using the Imprint ChIP kit (Sigma, St. Louis, MO). Homogenized hypothalamic tissue (20 mg) was cross-linked with 1% formaldehyde, the chromatin isolated, incubated with cell lysis buffer, and digested with micrococcal nuclease (2 U/ml; Sigma) to generate fragments of genomic DNA with an average size of 500 bp. Equal amounts of digested chromatin were immunoprecipitated with 1  $\mu$ g of each of the following antibodies: mouse IgG (M8695; Sigma), RNA polymerase II (R1530; Sigma), or Rabbit polyclonal histone H3 acetylK9 (H3K9Ac; Abgene, Rochester, NY; ab12178-50). The chromatin was washed, and the cross-links were hydrolyzed. The DNA was then used for PCR analysis using the same amplicons and conditions for GR and POMC as used for the methylation PCR (described above). PCR band intensity was quantified using ImageJ software.

### Statistical analysis

All data are presented as mean  $\pm$  SEM. Statistical analysis was performed using the unpaired Student's *t* test, repeated measures ANOVA or one-way ANOVA, and a Tukey honestly significant difference (HSD) *post hoc* test as appropriate using the GraphPad Prism software (GraphPad Software, Inc., La Jolla, CA). *P* < 0.05 was considered statistically significant.

## Results

### Identification of POMC and GR amplicons for ChIP and methylation analysis of ovine genomic DNA

The choice of DNA amplicons in this study was limited by the lack of available sheep genomic sequence. However, we were able to locate amplicon sequences based on conservation of sequence homology with mammalian genomes. The cow genome in particular is highly homologous to the sheep and has been used to generate virtual models of the sheep genome to aid in the creation of a genomic “scaffold” (55).

Homology analysis of the *POMC* gene region identified one candidate region (Fig. 1A) of highly conserved sequence (Fig. 1B) that was proximal to CpG islands. The same approach was used to screen the *GR* and *Oct4* gene regions (the latter used as a control), and similarly, one candidate region was identified in each gene (Fig. 1C) (data not shown) with highly conserved sequence that was within a CpG island (Fig. 1D) (data not shown). Primers were designed using the consensus sequence and used to amplify ovine genomic DNA, the ovine sequence was subsequently confirmed by sequencing (these sequence data have been submitted to the GenBank database under accession nos. GR, HM118850; POMC, HM118849; and Oct4, HM118848).

The marker of the ovine POMC promoter region used in this study started 6.5 kb from the 5' end of exon 1

(relative to human POMC sequence), where there is an associated CpG island studied previously in human cells and associated with expression of the *POMC* gene (56, 57). This sequence was CpG rich and located 2.5 kb downstream from regions homologous to the conserved hypothalamic enhancer regions (58, 59) and their associated CpG islands (Fig. 1A).

The *GR* gene promoter marker identified was located 5 kb upstream of the translational start site in exon 2 (Fig. 1C) within the 5' region of the CpG island associated with the transcriptional start sites of the exon 1 region as mapped by homology to the human genome (Fig. 1D). This amplicon was CpG rich and proximal to glucocorticoid regulatory regions defined in the human genome (60).

The *Oct4* gene has been shown to be a hypermethylated pluripotency gene in humans (61) and was selected for this study to act as a control for methylation. A CpG-rich region is present in the *Oct4* gene over the translational start site that shows conserved homology between human, cow, dog, and platypus genomes (data not shown). A sheep amplicon was selected within this Oct4 CpG island 1 kb downstream of the translational start identified by conserved homology.

### Baseline HPA axis activity is not changed in fetuses from mothers with periconceptual undernutrition

There was no significant difference in fetal plasma POMC concentrations between fetuses from the maternal underfed and control groups over 96 h between d 131 and 135 of pregnancy (Fig. 2A). This time period was selected because it was before the cortisol surge that correlates with parturition (62). Similarly, there was no difference in total amounts of fetal plasma POMC, ACTH, and cortisol present over this period (area under the curve analysis) (Fig. 2B).

Immunohistochemistry demonstrated POMC expression in the anterior pituitary and intermediate lobe of fetal tissue from d 135 (data not shown). Methylation and mRNA expression of the POMC promoter marker was assessed in fetal pituitary tissue for comparison with hypothalamic data. Methylation of the POMC promoter region was not altered in anterior pituitary fetal tissue from underfed mothers compared with controls (Fig. 2C), and POMC mRNA expression was unchanged between the groups (Fig. 2D). POMC expression in the pituitary was up to 200-fold greater than observed in the hypothalamus as expected.

### H3K9Ac associated with the hypothalamic POMC promoter in fetuses from mothers with periconceptual undernutrition

Hypothalami from d 135 fetal sheep expressed POMC, NPY, and GR protein (data not shown), markers of a functional nutritional regulatory pathway in the hypo-



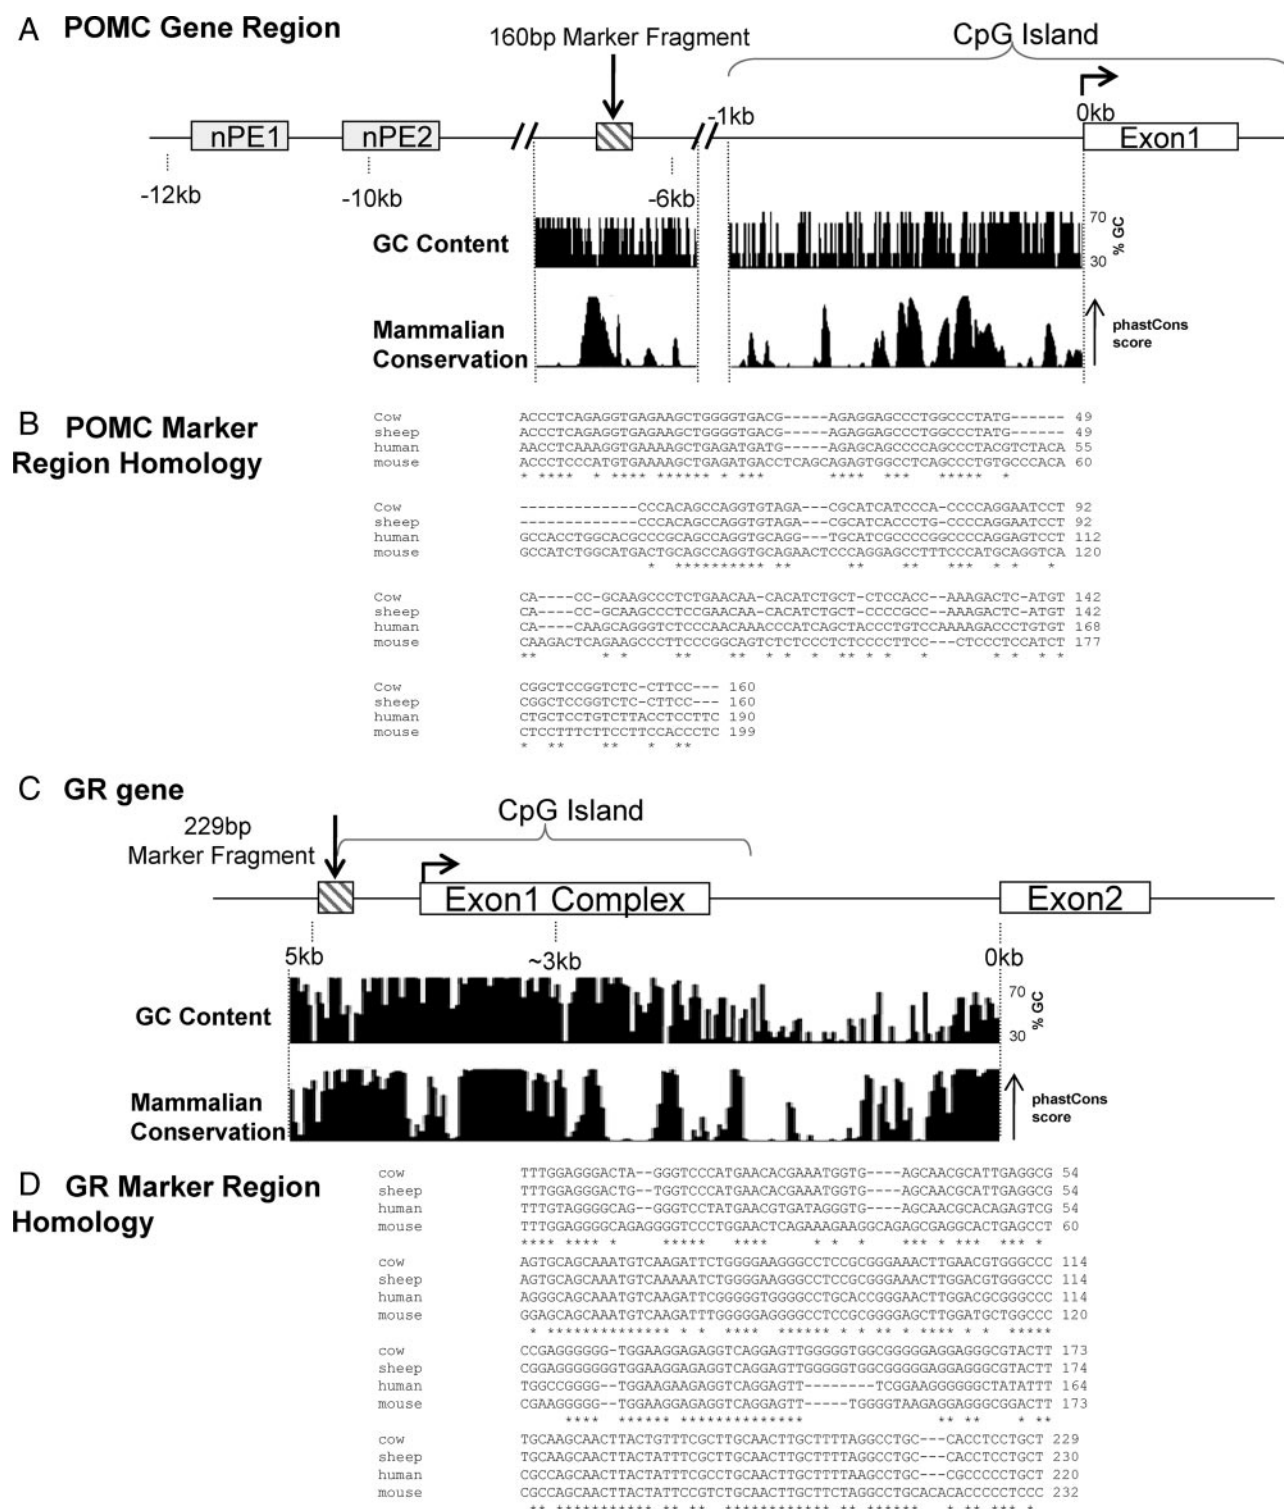

**FIG. 1.** POMC and GR gene region screening to identify highly conserved, CpG-rich regions. A, The *POMC* gene region with GC content and mammalian sequence homology mapped from the bovine genome (UCSC database). B, Direct comparison of the *POMC* amplicon marker region in cow, sheep, mouse, and human sequences. C, The *GR* gene region with GC content and mammalian sequence homology mapped from the bovine genome (UCSC database). D, Direct comparison of the *GR* amplicon marker region in cow, sheep, mouse, and human sequences. Sequence homology mapping was performed using the phastCons software (48). Striped box indicates promoter marker region. nPE, Neuronal POMC enhancer.

thalamus. POMC expression was localized, by immunohistochemistry, mainly in the ARC of the fetal sheep ventral hypothalamus (data not shown).

H3K9Ac on the POMC promoter marker was examined using ChIP (Fig. 3A). Chromatin from the ventral hypothalami of d 131 fetuses from groups of control ewes

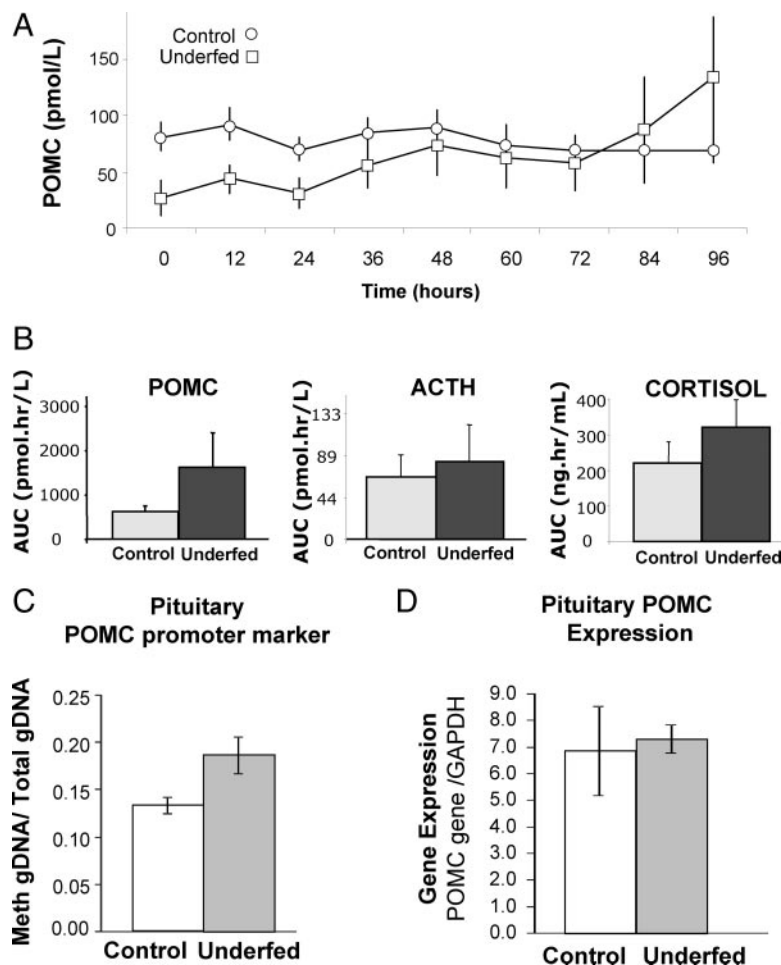

**FIG. 2.** HPA axis activity in fetal sheep from control ewes or ewes subjected to periconceptional undernutrition (underfed from 60 d before conception to 30 d after conception). A, Plasma POMC concentration over 96 h starting at d 131 of pregnancy (control group,  $n = 8$ ; undernutrition group,  $n = 6$ ). B, Area under the curve (AUC) analysis over 96 h from d 131 of pregnancy for POMC (pmol/h · liter), ACTH (pmol/h · liter), and cortisol (ng/h · ml). C, Pituitary tissue samples were obtained from the fetuses for promoter region methylation analysis of the *POMC* gene promoter marker amplicon in the pituitary (control,  $n = 6$ ; underfed,  $n = 6$ ). D, Expression levels of the *POMC* gene in total RNA purified from pituitary samples (control,  $n = 6$ ; underfed,  $n = 6$ ).

and groups of ewes subjected to periconceptional undernutrition from  $-60$  to  $+30$  d relative to conception was immunoprecipitated with a polyclonal antibody to histone H3 acetyl-K9 (Fig. 3B). There was a 1.63-fold increase of H3K9Ac in ventral hypothalami from the fetuses of the underfed group compared with the control group ( $P < 0.001$ ).

RNA Polymerase II was used as a positive control identifying binding to the *POMC* marker region when it is associated with the transcriptional machinery (Fig. 3A). This occurs via folding of the promoter to bring the marker region in close proximity to the transcription start site. This mechanism has been shown previously for *POMC*, when RNA Polymerase II was immunoprecipitated with a promoter region fragment approximately 400 bp upstream of the transcriptional start site (34). The associa-

tion of promoter elements distant to the transcriptional start site have also been shown to effectively immunoprecipitate with RNA Polymerase II in a genomic screen (63).

### Methylation of the hypothalamic *POMC* gene in fetuses from undernourished ewes

Initially, whole hypothalami were taken from fetuses of a group of normally nourished and underfed animals at d 135 of pregnancy. Analysis of the *POMC* marker region in the whole hypothalami revealed a 64% decrease in methylation in the fetal hypothalami from the underfed group compared with the controls ( $P < 0.01$ ) (Fig. 3C).

*POMC* from tissue restricted mainly to the ARC was also assessed in a group of animals subjected to periconceptional undernutrition (from  $-60$  to  $+30$  d relative to conception) but killed at d 131 of pregnancy. Genomic DNA from ventral hypothalamic slices containing the third ventricle revealed a 62% decrease in *POMC* marker methylation in the fetal hypothalami from the underfed group compared with the control group ( $P < 0.001$ ) (Fig. 3D).

### Quantitative analysis of *POMC* gene expression in the hypothalamus of fetuses from undernourished ewes

There was no difference in expression of *POMC* in the maternally underfed group compared with the control group in the whole hypothalami or the ventral hypothalami (from d 135 and 131 fetuses, respectively) (Fig. 4). NPY expression was not altered in either whole hypothalami (Fig. 4A) or the arcuate-enriched ventral region (Fig. 4B).

### H3K9Ac on the hypothalamic *GR* gene in fetuses from undernourished ewes

Because glucocorticoids are known to play a role in appetite regulation, we assessed the effect of periconceptional undernutrition on the hypothalamic *GR* gene. In rats, a CpG island is found approximately 2.5-kb 5' of exon 2 associated with the complex of different exon 1 regions. Hypomethylation of this region has been associated with increased *GR* expression (64). The *GR* gene exon 1 region is well characterized in humans and rats and as the start site for *GR* tran-

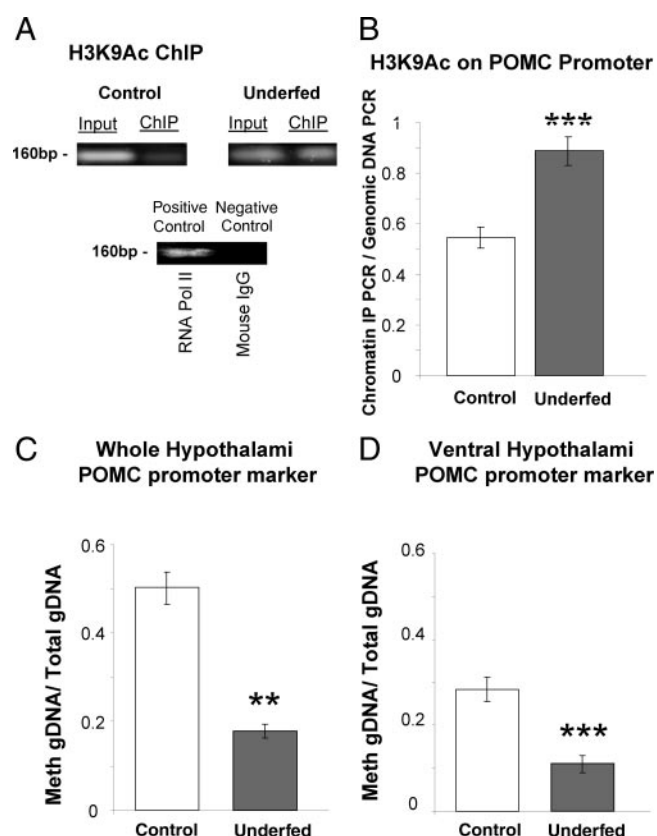

**FIG. 3.** Epigenetic changes associated with the *POMC* gene in the fetal hypothalamus. Fetal hypothalamic tissue samples were obtained from normal and underfed maternal sheep (underfed from 60 d before to 30 d after conception). A, Genomic DNA (gDNA) was purified from the tissue. DNA immunoprecipitated with a histone H3K9 acetylation antibody was then used for PCR to detect the presence of the *POMC* gene promoter marker. An antibody to RNA Polymerase II (RNA Pol II) was used as a positive control and mouse IgG as a negative control. B, Ratio of PCR signal from H3K9Ac immunoprecipitated DNA to total genomic DNA for DNA purified from gestational age d 131 ventral hypothalamic sections (control,  $n = 9$ ; underfed,  $n = 11$ ). C, Ratio of *POMC* gene promoter marker PCR signal from methylated genomic DNA to total genomic DNA for whole hypothalami at gestational age d 135 (control,  $n = 3$ ; underfed,  $n = 3$ ). D, Ratio of *POMC* gene promoter marker PCR signal from methylated genomic DNA to total genomic DNA for ventral hypothalamic sections at gestational age d 131 (control,  $n = 9$ ; underfed,  $n = 11$ ). \*\*,  $P < 0.01$ ; \*\*\*,  $P < 0.001$ .

scription (65). The sheep GR promoter region marker identified in this study was located in a similar CpG region and was used to examine the presence of H3K9Ac, as a marker of transcriptional activity (Fig. 1C).

To investigate GR gene promoter H3K9Ac status, homogenized tissue was used from the same ventral hypothalamic samples taken for the POMC analysis (Fig. 5A). Genomic DNA fragments pulled down with the immunoprecipitation were used as PCR template for the 229-bp sheep GR promoter region marker (Fig. 1C). There was a 1.60-fold increase of H3K9Ac in ventral hypothalami from the fetuses of the underfed group compared with the normal group ( $P < 0.001$ ) (Fig. 5B).

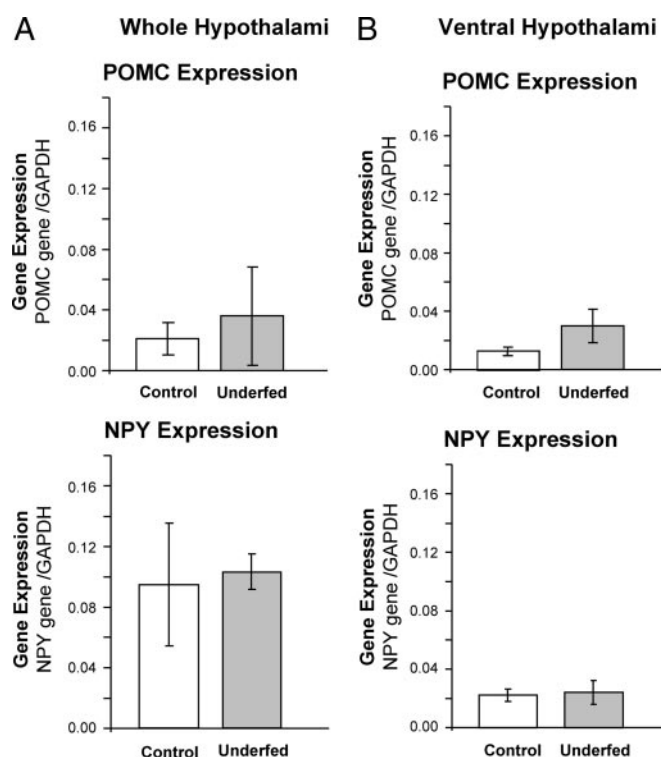

**FIG. 4.** Expression of the *POMC* gene in the fetal hypothalamus. Fetal hypothalamic tissue samples were obtained from control and underfed (from 60 d before conception to 30 d after conception). Total RNA was used to quantify expression levels of *POMC* and *NPY* genes. *POMC* and *NPY* expression levels were normalized to glyceraldehyde-3-phosphate dehydrogenase (GAPDH). A, Expression levels of *POMC* and *NPY* in total RNA purified from whole hypothalami at gestational d 135 (control,  $n = 3$ ; underfed,  $n = 3$ ). B, Expression levels of *POMC* and *NPY* in total RNA purified from ventral hypothalamic sections at gestational age d 131 enriched for ARC (control,  $n = 9$ ; underfed,  $n = 11$ ).

### Hypomethylation of the hypothalamic GR gene in fetuses from undernourished ewes

Analysis of the sheep GR promoter marker region in the whole hypothalami revealed a 40% decrease in methylation in underfed fetuses compared with controls ( $P < 0.05$ ) (Fig. 6A). GR is ubiquitously expressed in the hypothalamus with a higher level of expression in the paraventricular nucleus, where it is involved with regulation of POMC and NPY (41). GR expression levels are also altered in the ventral hypothalamus in food restricted rats (39). Therefore, we examined tissue from the ventral hypothalamus that contained mainly the ARC as previously used for POMC analysis. Genomic DNA was extracted from the ventral hypothalamic slice and enriched for methylated DNA. There was a 53% decrease in methylation in the fetal ventral hypothalami from the underfed group compared with the control group ( $P < 0.05$ ) (Fig. 6B).

In comparison, methylation of this GR promoter region was shown to be unaltered in fetal pituitary and hippocampal tissue in the group from underfed mothers compared with controls (Fig. 6, C and D).

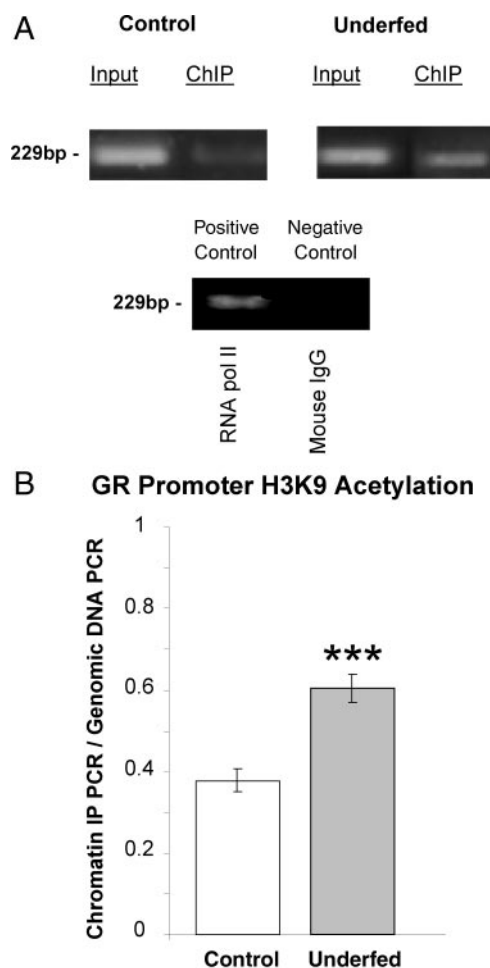

**FIG. 5.** Presence of H3K9Ac associated with the *GR* gene promoter in the fetal hypothalamus. **B**, Ratio of PCR signal from H3K9Ac immunoprecipitated DNA to total genomic DNA purified from ventral hypothalamic sections enriched for ARC (normal,  $n = 9$ ; underfed,  $n = 11$ ). \*\*\*,  $P < 0.001$ . Fetal hypothalamic tissue samples were obtained from normal and underfed maternal sheep (underfed from 60 d before conception to 30 d after conception) at d 131 of gestation. Genomic DNA was used for ChIP analysis with an antibody specific to H3K9Ac. **A**, PCR confirmed the presence of a 229-bp marker fragment of the *GR* gene promoter CpG island. RNA Pol II, RNA Polymerase II.

The *Oct4* gene is hypermethylated across a range of human tissues (61). A sheep amplicon that marked the CpG island surrounding the translational start site of the *Oct4* gene was shown to be hypermethylated in sheep fetal hypothalamic tissue in both undernourished and control groups with no difference between groups (Fig. 6E).

#### Quantitative analysis of *GR* gene expression in hypothalami of fetuses from undernourished ewes

In whole hypothalami, there was a 1.8-fold increase in the expression of the *GR* gene in the underfed compared with the control group ( $P < 0.05$ ) (Fig. 7A), where we had previously shown no change in expression of the *NPY* gene (Fig. 4A). In the ventral hypothalami, there was a 4.7-fold increase in *GR* gene expression ( $P < 0.05$ ) (Fig.

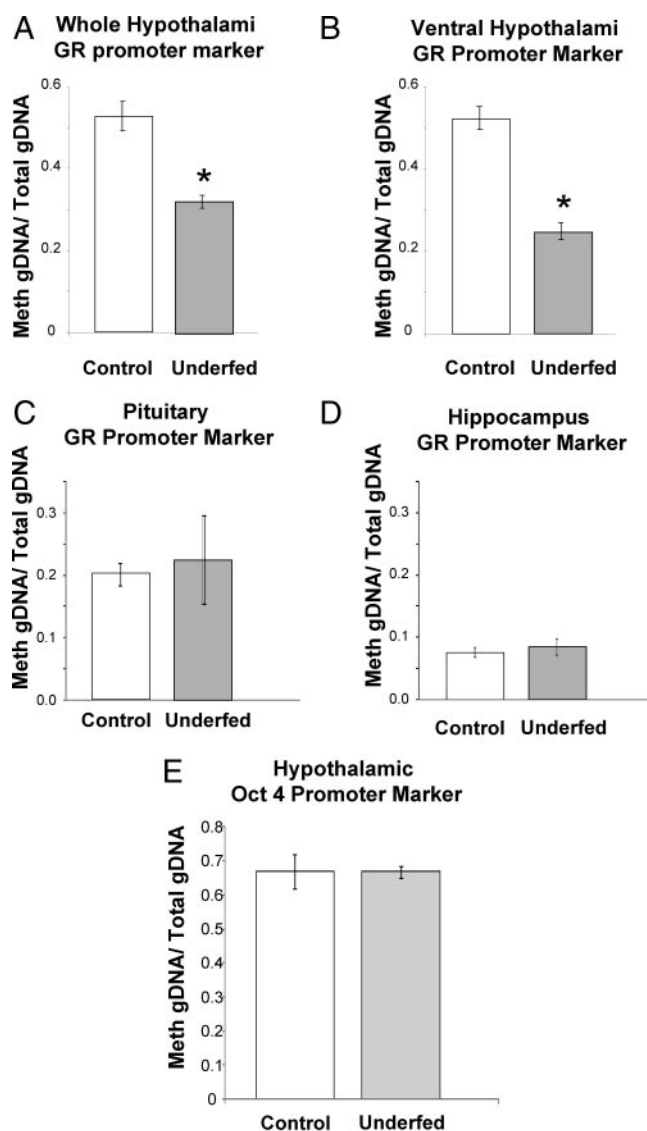

**FIG. 6.** Methylation of *GR* gene promoter region in the fetal hypothalamus. Hypothalamic tissue samples were obtained from control and underfed (from 60 d before conception to 30 d after conception) fetal sheep. **A**, Ratio of *GR* amplicon signal from methylated genomic DNA (Meth gDNA) to total genomic DNA for DNA purified from the whole hypothalami (control,  $n = 3$ ; underfed,  $n = 3$ ). **B**, Ratio of *GR* amplicon signal from methylated genomic DNA to total genomic DNA for DNA purified from ventral hypothalamic sections enriched for ARC (control,  $n = 9$ ; underfed,  $n = 11$ ). \*,  $P < 0.05$ . **C**, Ratio of *GR* amplicon from methylated genomic DNA to total genomic DNA for DNA purified from pituitary samples at gestational age d 131 (control,  $n = 12$ ; underfed,  $n = 12$ ). **D**, Ratio of *GR* amplicon from methylated genomic DNA to total genomic DNA for DNA purified from hippocampal samples at gestational age d 131 (control,  $n = 12$ ; underfed,  $n = 12$ ). **E**, Ratio of *Oct4* amplicon from methylated genomic DNA to total genomic DNA for DNA purified from ventral hypothalamic samples at gestational age d 131 (control,  $n = 4$ ; underfed,  $n = 6$ ).

7B), where we had previously shown no change in *NPY* gene expression (Fig. 4B).

In pituitary and hippocampal tissue, fetal *GR* gene expression was unchanged between the fetuses from the maternal underfed group and the control group (Fig. 7C).



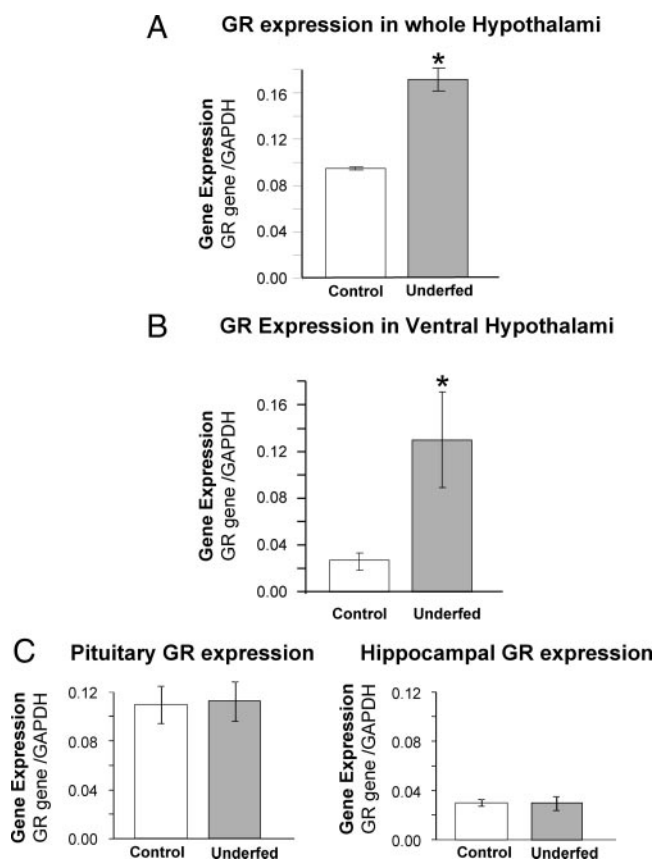

**FIG. 7.** Expression of *GR* gene in the fetal hypothalamus. Fetal hypothalamic tissue samples were obtained from control and underfed maternal sheep (from 60 d before conception to 30 d after conception); 2  $\mu$ g of total RNA were used to quantify expression levels of *GR*. A, Expression levels of *GR* and *NPY* in total RNA purified from the whole hypothalami (control,  $n = 3$ ; underfed,  $n = 3$ ). B, Expression levels of *GR* in total RNA purified from ventral hypothalamic sections enriched for ARC (control,  $n = 9$ ; underfed,  $n = 11$ ). C, Expression levels of *GR* in pituitary and hippocampal tissue from fetal sheep at gestational d 131. GAPDH, Glyceraldehyde-3-phosphate dehydrogenase.

### The effect of duration of undernutrition on hypothalamic *GR* and *POMC* genes

The investigation of epigenetic changes was extended to other periods of periconceptual undernutrition, *i.e.* from  $-60$  d to conception ( $-60$  to  $0$  d) or from conception to  $30$  d after ( $-2$  to  $+30$  d). Methylation of both *POMC* and *GR* promoter markers was significantly reduced in all undernutrition groups compared with controls (Fig. 8A). *POMC* expression was not increased in any of the undernutrition groups compared with controls. However, there was a marked increase in the expression of the *GR* gene in the  $-60$  to  $+30$  d group (Fig. 8B). The expression of the *NPY* gene in the enriched hypothalami was not significantly different to controls (Fig. 8B).

### Discussion

This study has identified important epigenetic changes in *POMC* and *GR* genes in the fetal hypothalamus after

periconceptual maternal undernutrition. Expression of *GR* mRNA is increased in fetal hypothalami collected 100 d after the periconceptual undernutrition of the mother ceased, and this is associated with promoter hypomethylation and increased H3K9 acetylation. In contrast, the *POMC* gene from late-gestation fetal hypothalami after maternal periconceptual undernutrition shows no change in expression of mRNA, although the *POMC* gene promoter region is hypomethylated and H3K9 acetylation levels are increased. This provides evidence for epigenetic changes that could act as a programming mechanism for the hypothalamic *POMC* and *GR* genes and predispose hypothalamic feeding centers to abnormal regulation later in life. Indeed, 10-month-old offspring from ewes undernourished using the same protocol were found to have abnormal glucose tolerance and increased body weight (28).

The hypomethylation of both *POMC* and *GR* genes occurs after maternal undernutrition irrespective of the developmental window during which the undernutrition occurred. The observation of similar levels of hypomethylation in both fetal *POMC* and *GR* genes across different periods of periconceptual undernutrition suggests that short time frames either side of conception are sufficient to alter regulatory patterns of fetal hypothalamic genes. This is consistent with observations of the differences in fetal glucose-insulin and HPA axis responses between these groups (47).

It would appear that an early nutritional insult alters the development of fetal hypothalamic appetite regulation centers to increase postnatal survival, assuming a continuation of the undernutrition. This suggests that an adaptive response by the fetus to undernutrition allows an increased chance of postnatal survival (7). However, if such changes persist in adulthood when food is abundant, a defect in normal appetite regulation may subsequently lead to overeating and obesity. This may explain several findings that animals undernourished prenatally are hyperphagic when given hypercaloric or high-fat diet postnatally, compared with control animals (31, 66). The current study has not addressed fetal weight and catch up growth, but in a previous study, using the same protocol, fetuses from undernourished mothers grew more slowly than well-nourished controls, but this was not reflected by size in late gestation (47).

Significant hypomethylation of the *POMC* promoter marker was observed in this study, which would suggest that the promoter region is made more accessible to regulation, but this would not necessarily lead to altered expression of the *POMC* gene at this prenatal stage. Hypomethylation of this marker may indicate hypomethylation across elements of the *POMC* promoter CpG island. This may therefore be

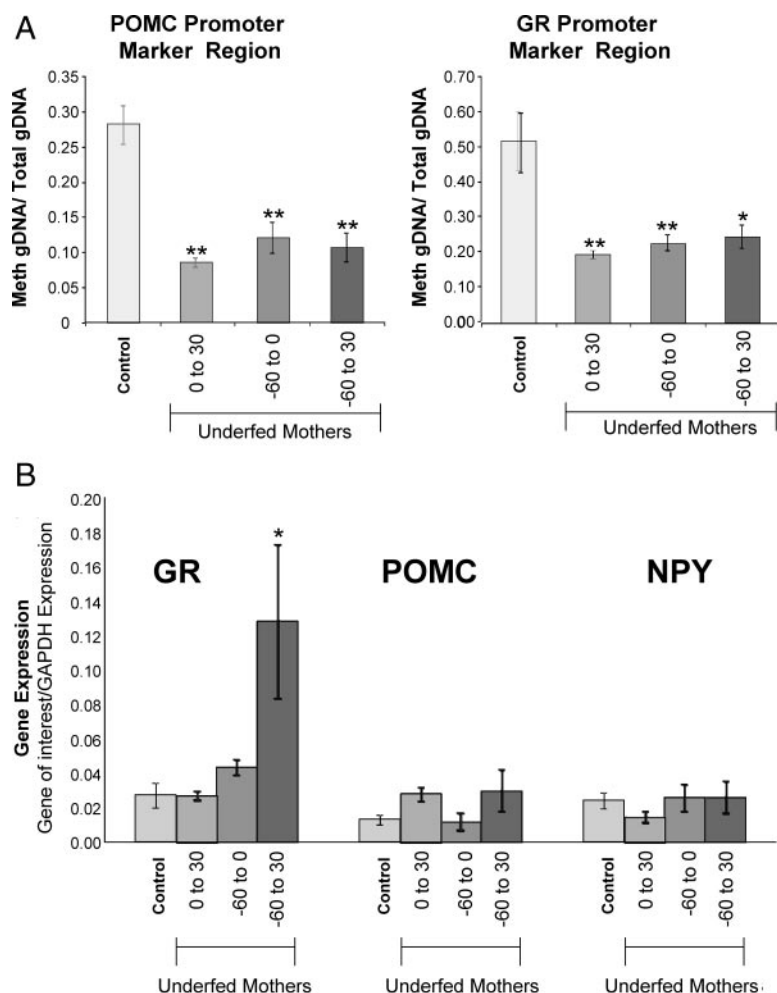

**FIG. 8.** The effect of different periods of periconceptional undernutrition on hypothalamic *GR*, *POMC*, and *NPY* methylation and gene expression. The  $-60$  to  $+30$  group (UN  $-60$  to  $+30$ ) was undernourished from 60 d before conception to 30 d after conception. The  $-60$  to 0 group (UN  $-60$  to 0) were fed the same diet as the  $-60$  to  $+30$  group but were allowed to feed *ad libitum* from conception. The  $-2$  to  $+30$  group (UN  $-2$  to  $+30$ ) were fed the same diet for 30 d after conception. Fetal ventral hypothalamic tissue samples, enriched for the ARC, were obtained from all sample groups at d 131 of gestation. A, Methylation of *GR* and *POMC* promoter marker in ventral hypothalamus from controls ( $n = 7$ ),  $-60$  to  $+30$  ( $n = 9$ ),  $-60$  to 0 ( $n = 8$ ), and  $-2$  to  $+30$  ( $n = 7$ ) feeding regimens. The 229-bp marker of the *GR* gene and the 160-bp marker of the *POMC* gene promoter region CpG islands were used to compare the ratio of methylated with unmethylated DNA. One-way ANOVA with Tukey HSD *post hoc* test compared with control group. \*,  $P < 0.05$ ; \*\*\*,  $P < 0.001$ . B, Transcriptional expression of *POMC*, *GR*, and *NPY* in the ventral hypothalamus from controls ( $n = 7$ ),  $-60$  to  $+30$  ( $n = 11$ ),  $-2$  to  $+30$  ( $n = 7$ ), and  $-60$  to 0 ( $n = 8$ ) feeding regimens. One-way ANOVA with Tukey HSD *post hoc* test compared with all other groups. \*,  $P < 0.05$ . Meth gDNA, Methylated genomic DNA; GAPDH, glyceraldehyde-3-phosphate dehydrogenase; UN, Underfed.

associated with the changes in transcription factor binding identified by Newell-Price *et al.* (57) and also mark the region associated with cortisol-dependent demethylation identified by Mizoguchi *et al.* (66). Recently, hypomethylation of part of the proximal *POMC* gene promoter was associated with food restriction, in a rat model of maternal undernutrition, while equivalent regions in *CART* and *NPY* were not altered (67).

Silencing mechanisms associated with methylated genomic DNA can involve direct interference between a

methylated CpG and the binding of a transcription factor, as has been shown with the interaction between the nerve growth factor inducible-A transcription factor and the *GR* gene (68, 69). Plagemann *et al.* (35) have examined the role of methylation in the regulation of hypothalamic *POMC* expression in a rat neonatal overfeeding model and demonstrated hypermethylation in SP1 binding regions. However, we were not able to examine these regions directly because there is no ovine genomic sequence currently available for the homologous regions. Highly conserved hypothalamic-specific *POMC* regulatory regions have been identified approximately 9 kb upstream of the start of exon 1 (Fig. 1A) (58, 59), and it is possible that the *POMC* promoter marker region used in this study acts as a marker of methylation changes within this region or in as yet undiscovered tissue specific regulatory regions.

Rats undernourished perinatally have decreased hypothalamic *POMC* expression with maternal undernutrition (24), and the long-term appetite-regulatory system of offspring is altered (25). In the current study, there was no significant difference in hypothalamic *POMC* expression between the maternally underfed and the control group, in line with previous work (26, 37). However, when these offspring were fed a high-fat diet, there were alterations in *POMC* gene expression (26). Delahaye *et al.* (24) measured *POMC* in postnatal life as opposed to fetal life, and therefore, it may be that in the current model, changes may be observed at an equivalent developmental postnatal age (24, 47). Caution must be observed with the comparison of data

generated in rats with observations made in sheep and humans in that the hypothalamic neuroendocrine circuitry is established after birth in rodents and before birth in both sheep and humans, potentially making the sheep model a better comparison with humans than a rat model (46).

The importance of glucocorticoids in the control of energy homeostasis is exemplified by Zucker rats, where adrenalectomy normalizes body weight and glucocorticoid replacement results in increased weight gain (70, 71). The

role of glucocorticoids is highlighted in POMC knockout mice when pituitary POMC expression is restored. This activates adrenal glucocorticoid production and development of obesity (72).

The GR marker region used in this study is close to the rat GR 1<sub>7</sub> promoter region, where epigenetic changes have been found concomitant with changes in hippocampal GR expression associated with altered maternal care (69). Also, recently, glucocorticoid responsive elements have been identified proximal to this region that are active in the auto-regulation of GR expression in human lymphoblastoid cells (60). In the current study, there was a marked increase in the H3K9Ac of the GR gene promoter in the hypothalamus from fetuses exposed to maternal undernutrition. This histone modification would suggest open chromatin in the GR promoter region (69) and, together with observed hypomethylation of the GR promoter marker, would predict that GR gene expression is up-regulated. This change should be faithfully replicated during mitosis (69). Indeed, in this study, an increase in hypothalamic GR gene expression was associated with these observed epigenetic changes.

Because glucocorticoids can regulate both POMC and NPY, it is difficult to speculate on the implications of increased GR expression in the hypothalamus, because these neuropeptides have opposing effects on energy balance. It is well known that glucocorticoids decrease POMC gene expression in the pituitary, and therefore, it might be predicted that decreased POMC expression in the hypothalamus could up-regulate food intake (41, 73). However, there are tissue specific promoter regions in the POMC gene. It has been shown that 13 kb of 5' POMC gene flanking sequence are required for appropriate spatial and temporal expression in the hypothalamus (74), and recently, hypothalamic specific control regions have been well defined within this region (58, 59).

Therefore, it may not be surprising that glucocorticoids have been shown to up-regulate POMC gene expression in the hypothalamus as demonstrated in adrenalectomised rats, where the loss of glucocorticoids results in a decrease in POMC expression and this effect is completely reversed by replacement of physiological doses of glucocorticoid (75). POMC mRNA levels are also positively regulated by glucocorticoids in the rat ARC, in that adrenalectomy produced a marked decrease in POMC mRNA, and this was reversed by treatment with dexamethasone (76). Similarly, glucocorticoids up-regulate ACTH production in rodent hypothalamic arcuate neurons (77). Therefore, this evidence would predict glucocorticoid up-regulation of POMC expression, which would subsequently lead to a lean phenotype (72). In comparison, it is known that in-

creased glucocorticoid signaling in NPY neurons would up-regulate NPY in animals given a high caloric diet (78).

In summary, pre- and periconceptional maternal undernutrition are associated with changes in late gestation in fetal hypothalamic genes involved in feeding regulatory networks. This suggests that minimizing risk of programming effects in humans needs to consider interventions before conception. The epigenetic modification of the genes is suggested by the H3K9Ac associated with POMC and GR genes and the hypomethylation of POMC and GR gene markers in the fetal hypothalamic neurons. Given that POMC and GR are centrally involved in modulating food intake, this potential for long-term programming could have implications for hypothalamic regulation of energy balance in adult offspring.

## Acknowledgments

Address all correspondence and requests for reprints to: Professor Anne White, Faculties of Life Sciences and Medical and Human Sciences, Manchester Academic Health Sciences Centre, University of Manchester, 3.016 AV Hill Building, Manchester M13 9PT, United Kingdom. E-mail: anne.white@manchester.ac.uk.

This work was supported by the Health Research Council of New Zealand, the National Research Centre for Growth and Development, New Zealand, the Canadian Institutes of Health Research, and the National Institute for Health Research Manchester Biomedical Research Centre.

Disclosure Summary: The authors have nothing to disclose.

## References

1. Ford ES, Giles WH, Dietz WH 2002 Prevalence of the metabolic syndrome among US adults: findings from the third National Health and Nutrition Examination Survey. *JAMA* 287:356–359
2. Whitlock G, Lewington S, Sherliker P, Clarke R, Emberson J, Halsey J, Qizilbash N, Collins R, Peto R 2009 Body-mass index and cause-specific mortality in 900 000 adults: collaborative analyses of 57 prospective studies. *Lancet* 373:1083–1096
3. Ravelli GP, Stein ZA, Susser MW 1976 Obesity in young men after famine exposure in utero and early infancy. *N Engl J Med* 295:349–353
4. Barker DJ, Winter PD, Osmond C, Margetts B, Simmonds SJ 1989 Weight in infancy and death from ischaemic heart disease. *Lancet* 2:577–580
5. Birch NP, Tracer HL, Hakes DJ, Loh YP 1991 Coordinate regulation of mRNA levels of pro-opiomelanocortin and the candidate processing enzymes PC2 and PC3, but not furin, in rat pituitary intermediate lobe. *Biochem Biophys Res Commun* 179:1311–1319
6. Bloomfield FH, Oliver MH, Giannoulis CD, Gluckman PD, Harding JE, Challis JRG 2003 Brief Undernutrition in late-gestation sheep programs the hypothalamic-pituitary-adrenal axis in adult offspring. *Endocrinology* 144:2933–2940
7. Hales CN, Barker DJ 2001 The thrifty phenotype hypothesis. *Br Med Bull* 60:5–20
8. Bouret SG, Simerly RB 2004 Minireview: leptin and development of hypothalamic feeding circuits. *Endocrinology* 145:2621–2626



9. Buckley AJ, Jaquiere AL, Harding JE 2005 Nutritional programming of adult disease. *Cell Tissue Res* 322:73–79
10. Challis JR, Bloomfield FH, Bocking AD, Casciani V, Chisaka H, Connor K, Dong X, Gluckman P, Harding JE, Johnstone J, Li W, Lye S, Okamura K, Premyslova M 2005 Fetal signals and parturition. *J Obstet Gynaecol Res* 31:492–499
11. Stevens A, White A 2010 ACTH: cellular peptide hormone synthesis and secretory pathways. *Results Probl Cell Differ* 50:63–84
12. Kapoor A, Leen J, Matthews SG 2008 Molecular regulation of the hypothalamic-pituitary-adrenal axis in adult male guinea pigs after prenatal stress at different stages of gestation. *J Physiol* 586:4317–4326
13. Setiawan E, Jackson MF, MacDonald JF, Matthews SG 2007 Effects of repeated prenatal glucocorticoid exposure on long-term potentiation in the juvenile guinea-pig hippocampus. *J Physiol* 581:1033–1042
14. Sloboda DM, Moss TJ, Li S, Matthews SG, Challis JR, Newnham JP 2008 Expression of glucocorticoid receptor, mineralocorticoid receptor, and 11 $\beta$ -hydroxysteroid dehydrogenase 1 and 2 in the fetal and postnatal ovine hippocampus: ontogeny and effects of prenatal glucocorticoid exposure. *J Endocrinol* 197:213–220
15. Bloomfield FH, Oliver MH, Hawkins P, Holloway AC, Campbell M, Gluckman PD, Harding JE, Challis JR 2004 Periconceptual undernutrition in sheep accelerates maturation of the fetal hypothalamic-pituitary-adrenal axis in late gestation. *Endocrinology* 145:4278–4285
16. Bloomfield FH, Oliver MH, Hawkins P, Campbell M, Phillips DJ, Gluckman PD, Challis JR, Harding JE 2003 A periconceptual nutritional origin for noninfectious preterm birth. *Science* 300:606
17. Pritchard LE, White A 2005 Agouti-related protein: more than a melanocortin-4 receptor antagonist? *Peptides* 26:1759–1770
18. Cone RD, Lu D, Koppula S, Vage DI, Klungland H, Boston B, Chen W, Orth DN, Pouton C, Kesterton RA 1996 The melanocortin receptors: agonists, antagonists, and the hormonal control of pigmentation. *Recent Prog Horm Res* 51:287–317; discussion 318
19. Yaswen L, Diehl N, Brennan MB, Hochgeschwender U 1999 Obesity in the mouse model of pro-opiomelanocortin deficiency responds to peripheral melanocortin. *Nat Med* 5:1066–1070
20. Challis BG, Coll AP, Yeo GS, Pinnock SB, Dickson SL, Thresher RR, Dixon J, Zahn D, Rochford JJ, White A, Oliver RL, Millington G, Aparicio SA, Colledge WH, Russ AP, Carlton MB, O'Rahilly S 2004 Mice lacking pro-opiomelanocortin are sensitive to high-fat feeding but respond normally to the acute anorectic effects of peptide-YY(3–36). *Proc Natl Acad Sci USA* 101:4695–4700
21. Challis BG, Pritchard LE, Creemers JW, Delplanque J, Keogh JM, Luan J, Wareham NJ, Yeo GS, Bhattacharyya S, Froguel P, White A, Farooqi IS, O'Rahilly S 2002 A missense mutation disrupting a dibasic prohormone processing site in pro-opiomelanocortin (POMC) increases susceptibility to early-onset obesity through a novel molecular mechanism. *Hum Mol Genet* 11:1997–2004
22. Farooqi IS, Drop S, Clements A, Keogh JM, Biernacka J, Lowenbein S, Challis BG, O'Rahilly S 2006 Heterozygosity for a POMC-null mutation and increased obesity risk in humans. *Diabetes* 55:2549–2553
23. Parton LE, Ye CP, Coppari R, Enriori PJ, Choi B, Zhang CY, Xu C, Vianna CR, Balthasar N, Lee CE, Elmquist JK, Cowley MA, Lowell BB 2007 Glucose sensing by POMC neurons regulates glucose homeostasis and is impaired in obesity. *Nature* 449:228–232
24. Delahaye F, Breton C, Risold PY, Enache M, Dutriez-Casteloot I, Laborie C, Lesage J, Vieau D 2008 Maternal perinatal undernutrition drastically reduces postnatal leptin surge and affects the development of arcuate nucleus proopiomelanocortin neurons in neonatal male rat pups. *Endocrinology* 149:470–475
25. Breton C, Lukaszewski MA, Risold PY, Enache M, Guillemot J, Rivière G, Delahaye F, Lesage J, Dutriez-Casteloot I, Laborie C, Vieau D 2009 Maternal prenatal undernutrition alters the response of POMC neurons to energy status variation in adult male rat offspring. *Am J Physiol Endocrinol Metab* 296:E462–E472
26. Ikenasio-Thorpe BA, Breier BH, Vickers MH, Fraser M 2007 Prenatal influences on susceptibility to diet-induced obesity are mediated by altered neuroendocrine gene expression. *J Endocrinol* 193: 31–37
27. Sébert SP, Hyatt MA, Chan LL, Patel N, Bell RC, Keisler D, Stephenson T, Budge H, Symonds ME, Gardner DS 2009 Maternal nutrient restriction between early and midgestation and its impact upon appetite regulation after juvenile obesity. *Endocrinology* 150: 634–641
28. Todd SE, Oliver MH, Jaquiere AL, Bloomfield FH, Harding JE 2009 Periconceptual undernutrition of ewes impairs glucose tolerance in their adult offspring. *Pediatr Res* 65:409–413
29. Sinclair KD, Allegrucci C, Singh R, Gardner DS, Sebastian S, Bispham J, Thurston A, Huntley JF, Rees WD, Maloney CA, Lea RG, Craigon J, McEvoy TG, Young LE 2007 DNA methylation, insulin resistance, and blood pressure in offspring determined by maternal periconceptual B vitamin and methionine status. *Proc Natl Acad Sci USA* 104:19351–19356
30. Meaney MJ, Szyf M, Seckl JR 2007 Epigenetic mechanisms of perinatal programming of hypothalamic-pituitary-adrenal function and health. *Trends Mol Med* 13:269–277
31. Szyf M, Weaver I, Meaney M 2007 Maternal care, the epigenome and phenotypic differences in behavior. *Reprod Toxicol* 24:9–19
32. Sterner DE, Berger SL 2000 Acetylation of histones and transcription-related factors. *Microbiol Mol Biol Rev* 64:435–459
33. Weaver IC, Cervoni N, Champagne FA, D'Alessio AC, Sharma S, Seckl JR, Dymov S, Szyf M, Meaney MJ 2004 Epigenetic programming by maternal behavior. *Nat Neurosci* 7:847–854
34. Bilodeau S, Vallette-Kasic S, Gauthier Y, Figarella-Branger D, Brue T, Berthelet F, Lacroix A, Batista D, Stratakis C, Hanson J, Meij B, Drouin J 2006 Role of Brg1 and HDAC2 in GR trans-repression of the pituitary POMC gene and misexpression in Cushing disease. *Genes Dev* 20:2871–2886
35. Plagemann A, Harder T, Brunn M, Harder A, Roepke K, Wittrock-Staar M, Ziska T, Schellong K, Rodekamp E, Melchior K, Dudenhausen JW 2009 Hypothalamic proopiomelanocortin promoter methylation becomes altered by early overfeeding: an epigenetic model of obesity and the metabolic syndrome. *J Physiol* 587:4963–4976
36. Godfrey KM, Barker DJ 2000 Fetal nutrition and adult disease. *Am J Clinical Nutrition*, 71:1344–1352
37. Ikenasio-Thorpe BA, Breier BH, Vickers MH, Fraser M 2007 Prenatal influences on susceptibility to diet-induced obesity are mediated by altered neuroendocrine gene expression. *J Endocrinol* 193: 31–37
38. Szyf M, Weaver IC, Champagne FA, Diorio J, Meaney MJ 2005 Maternal programming of steroid receptor expression and phenotype through DNA methylation in the rat. *Front Neuroendocrinol* 26:139–162
39. Lindblom J, Haitina T, Fredriksson R, Schiöth HB 2005 Differential regulation of nuclear receptors, neuropeptides and peptide hormones in the hypothalamus and pituitary of food restricted rats. *Brain Res Mol Brain Res* 133:37–46
40. Brady LS, Smith MA, Gold PW, Herkenham M 1990 Altered expression of hypothalamic neuropeptide mRNAs in food-restricted and food-deprived rats. *Neuroendocrinology* 52:441–447
41. Pritchard LE, Turnbull AV, White A 2002 Pro-opiomelanocortin processing in the hypothalamus: impact on melanocortin signalling and obesity. *J Endocrinol* 172:411–421
42. Beaulieu S, Gagné B, Barden N 1988 Glucocorticoid regulation of proopiomelanocortin messenger ribonucleic acid content of rat hypothalamus. *Mol Endocrinol* 2:727–731
43. Pritchard LE, Oliver RL, McLoughlin JD, Birtles S, Lawrence CB, Turnbull AV, White A 2003 Proopiomelanocortin-derived peptides in rat cerebrospinal fluid and hypothalamic extracts: evidence that secretion is regulated with respect to energy balance. *Endocrinology* 144:760–766
44. Kalra SP 2008 Disruption in the leptin-NPY link underlies the pan-



- demic of diabetes and metabolic syndrome: new therapeutic approaches. *Nutrition* 24:820–826
45. Beck B 2000 Neuropeptides and obesity. *Nutrition* 16:916–923
  46. Symonds ME, Budge H 2009 Nutritional models of the developmental programming of adult health and disease. *Proc Nutr Soc* 68:173–178
  47. Rumball CW, Bloomfield FH, Oliver MH, Harding JE 2009 Different periods of periconceptional undernutrition have different effects on growth, metabolic and endocrine status in fetal sheep. *Pediatr Res* 66:605–613
  48. Siepel A, Bejerano G, Pedersen JS, Hinrichs AS, Hou M, Rosenbloom K, Clawson H, Spieth J, Hillier LW, Richards S, Weinstock GM, Wilson RK, Gibbs RA, Kent WJ, Miller W, Haussler D 2005 Evolutionarily conserved elements in vertebrate, insect, worm, and yeast genomes. *Genome Res* 15:1034–1050
  49. Crosby SR, Stewart MF, Ratcliffe JG, White A 1988 Direct measurement of the precursors of adrenocorticotropin in human plasma by two-site immunoradiometric assay. *J Clin Endocrinol Metab* 67:1272–1277
  50. Schwartz J, Rose JC 1998 Development of the pituitary adrenal axis in fetal sheep twins. *Am J Physiol* 274:R1–R8
  51. Gibson S, Crosby SR, Stewart MF, Jennings AM, McCall E, White A 1994 Differential release of proopiomelanocortin-derived peptides from the human pituitary: evidence from a panel of two-site immunoradiometric assays. *J Clin Endocrinol Metab* 78:835–841
  52. Jeffray TM, Matthews SG, Hammond GL, Challis JR 1998 Divergent changes in plasma ACTH and pituitary POMC mRNA after cortisol administration to late-gestation ovine fetus. *Am J Physiol* 274:E417–E425
  53. Connor KL, Challis JR, van Zijl P, Rumball CW, Alix S, Jaquiere AL, Oliver MH, Harding JE, Bloomfield FH 2009 Do alterations in placental 11 $\beta$ -hydroxysteroid dehydrogenase (11 $\beta$ HSD) activities explain differences in fetal hypothalamic-pituitary-adrenal (HPA) function following periconceptional undernutrition or twinning in sheep? *Reprod Sci* 16:1201–1212
  54. Arikawa E, Sun Y, Wang J, Zhou Q, Ning B, Dial SL, Guo L, Yang J 2008 Cross-platform comparison of SYBR Green real-time PCR with TaqMan PCR, microarrays and other gene expression measurement technologies evaluated in the microarray quality control (MAQC) study. *BMC Genomics* 9:328–328
  55. Dalrymple BP, Kirkness EF, Nefedov M, McWilliam S, Ratnakumar A, Barris W, Zhao S, Shetty J, Maddox JF, O'Grady M, Nicholas F, Crawford AM, Smith T, de Jong PJ, McEwan J, Oddy VH, Cockett NE 2007 Using comparative genomics to reorder the human genome sequence into a virtual sheep genome. *Genome Biol* 8:R152
  56. Newell-Price J 2003 Proopiomelanocortin gene expression and DNA methylation: implications for Cushing's syndrome and beyond. *J Endocrinol* 177:365–372
  57. Newell-Price J, King P, Clark AJ 2001 The CpG island promoter of the human proopiomelanocortin gene is methylated in nonexpressing normal tissue and tumors and represses expression. *Mol Endocrinol* 15:338–348
  58. Santangelo AM, de Souza FS, Franchini LF, Bumashny VF, Low MJ, Rubinstein M 2007 Ancient exaptation of a CORE-SINE retroposon into a highly conserved mammalian neuronal enhancer of the proopiomelanocortin gene. *PLoS Genet* 3:1813–1826
  59. de Souza FS, Santangelo AM, Bumashny V, Avale ME, Smart JL, Low MJ, Rubinstein M 2005 Identification of neuronal enhancers of the proopiomelanocortin gene by transgenic mouse analysis and phylogenetic footprinting. *Mol Cell Biol* 25:3076–3086
  60. Geng CD, Schwartz JR, Vedeckis WV 2008 A conserved molecular mechanism is responsible for the auto-up-regulation of glucocorticoid receptor gene promoters. *Mol Endocrinol* 22:2624–2642
  61. Schneider E, Plushch G, El HN, Galetzka D, Puhl A, Schorsch M, Frauenknecht K, Riepert T, Tresch A, Muller AM, Coerdts W, Zechner U, Haaf T 1 March 2010 Spatial, temporal and interindividual epigenetic variation of functionally important DNA methylation patterns. *Nucl Acids Res* 10.1093/nar/gkq126
  62. Symonds ME, Sebert SP, Hyatt MA, Budge H 2009 Nutritional programming of the metabolic syndrome. *Nat Rev Endocrinol* 5:604–610
  63. Tummala P, Mali RS, Guzman E, Zhang X, Mitton KP 2010 Temporal ChIP-on-Chip of RNA-polymerase-II to detect novel gene activation events during photoreceptor maturation. *Mol Vis* 16:252–271
  64. Lillycrop KA, Slater-Jefferies JL, Hanson MA, Godfrey KM, Jackson AA, Burdge GC 2007 Induction of altered epigenetic regulation of the hepatic glucocorticoid receptor in the offspring of rats fed a protein-restricted diet during pregnancy suggests that reduced DNA methyltransferase-1 expression is involved in impaired DNA methylation and changes in histone modifications. *Br J Nutr* 97:1064–1073
  65. Turner JD, Schote AB, Macedo JA, Pelascini LP, Muller CP 2006 Tissue specific glucocorticoid receptor expression, a role for alternative first exon usage? *Biochem Pharmacol* 72:1529–1537
  66. Mizoguchi Y, Kajume T, Miyagawa S, Okada S, Nishi Y, Kobayashi M 2007 Steroid-dependent ACTH-produced thymic carcinoid: regulation of POMC gene expression by cortisol via methylation of its promoter region. *Horm Res* 67:257–262
  67. Coupé B, Amarger V, Grit I, Benani A, Parnet P 2010 Nutritional programming affects hypothalamic organization and early response to leptin. *Endocrinology* 151:702–713
  68. McGowan PO, Meaney MJ, Szyf M 2008 Diet and the epigenetic (re)programming of phenotypic differences in behavior. *Brain Res* 1237:12–24
  69. Weaver IC 2009 Epigenetic effects of glucocorticoids. *Semin Fetal Neonatal Med* 14:143–150
  70. Marchington D, Rothwell NJ, Stock MJ, York DA 1983 Energy balance, diet-induced thermogenesis and brown adipose tissue in lean and obese (fa/fa) Zucker rats after adrenalectomy. *J Nutr* 113:1395–1402
  71. York DA, Holt SJ, Marchington D 1985 Regulation of brown adipose tissue thermogenesis by corticosterone in obese fa/fa rats. *Int J Obes* 9(Suppl 2):89–95
  72. Smart JL, Tolle V, Low MJ 2006 Glucocorticoids exacerbate obesity and insulin resistance in neuron-specific proopiomelanocortin-deficient mice. *J Clin Invest* 116:495–505
  73. Krude H, Grüters A 2000 Implications of proopiomelanocortin (POMC) mutations in humans: the POMC deficiency syndrome. *Trends Endocrinol Metab* 11:15–22
  74. Young JL, Otero V, Cerdán MG, Falzone TL, Chan EC, Low MJ, Rubinstein M 1998 Authentic cell-specific and developmentally regulated expression of pro-opiomelanocortin genomic fragments in hypothalamic and hindbrain neurons of transgenic mice. *J Neurosci* 18:6631–6640
  75. Wardlaw SL, McCarthy KC, Conwell IM 1998 Glucocorticoid regulation of hypothalamic proopiomelanocortin. *Neuroendocrinology* 67:51–57
  76. Pelletier G 1993 Regulation of proopiomelanocortin gene expression in rat brain and pituitary as studied by in situ hybridization. *Ann NY Acad Sci* 680:246–259
  77. Ozawa H, Lion J, Xie CX, Nishi M, Steinbusch H, Kawata M 1999 Down-regulation of ACTH and glucocorticoid receptor immunoreactivity in hypothalamic arcuate neurons after adrenalectomy in the rat. *Neuroreport* 10:1571–1575
  78. Jeanrenaud B, Rohner-Jeanrenaud F 2000 CNS-periphery relationships and body weight homeostasis: influence of the glucocorticoid status. *Int J Obes Relat Metab Disord* 24(Suppl 2):S74–S76
